# Supplementary material for: Synthesis of PEITC-loaded gold nanoparticles and evaluation of the hepatoprotective effect on CCl 4 -induced damage through Nrf2 pathway
Source: publisher site journal article supplement (doi:10.1515/tjb-2022-0208), 2023-01-02
Supplement: Supplementary file 1 [file j_tjb-2022-0208_suppl.docx]

**Supplementary Material**

**Synthesis of PEITC-loaded gold nanoparticles and evaluation of the hepatoprotective effect on CCl4-induced damage through Nrf2 pathway**


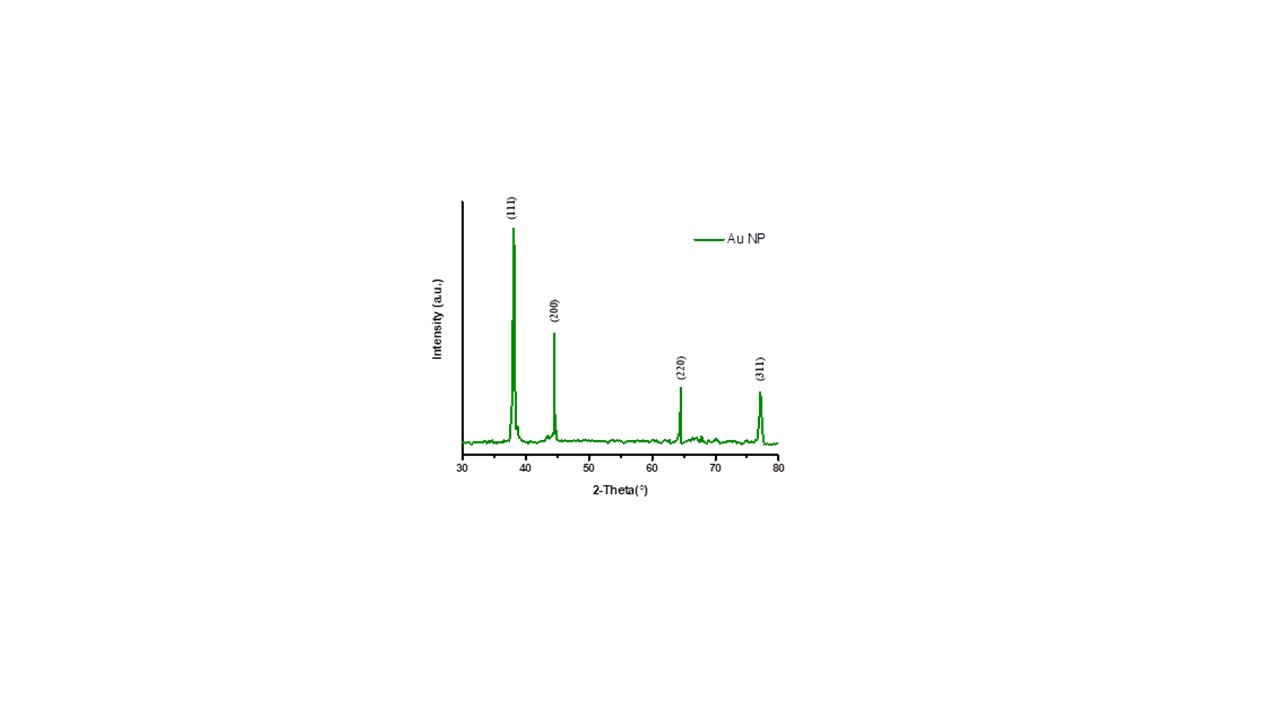


**Figure S1.** Diffraction pattern of AuNP

**
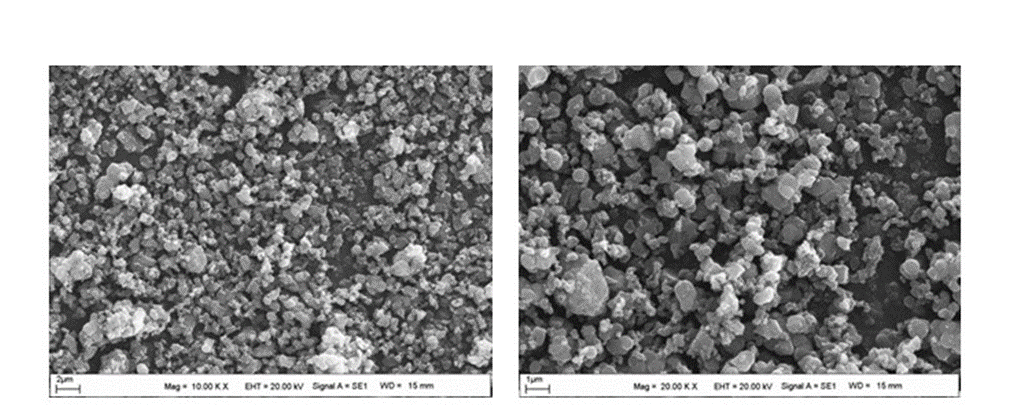
**

**Figure S2.** SEM images of AuNP at different magnifications


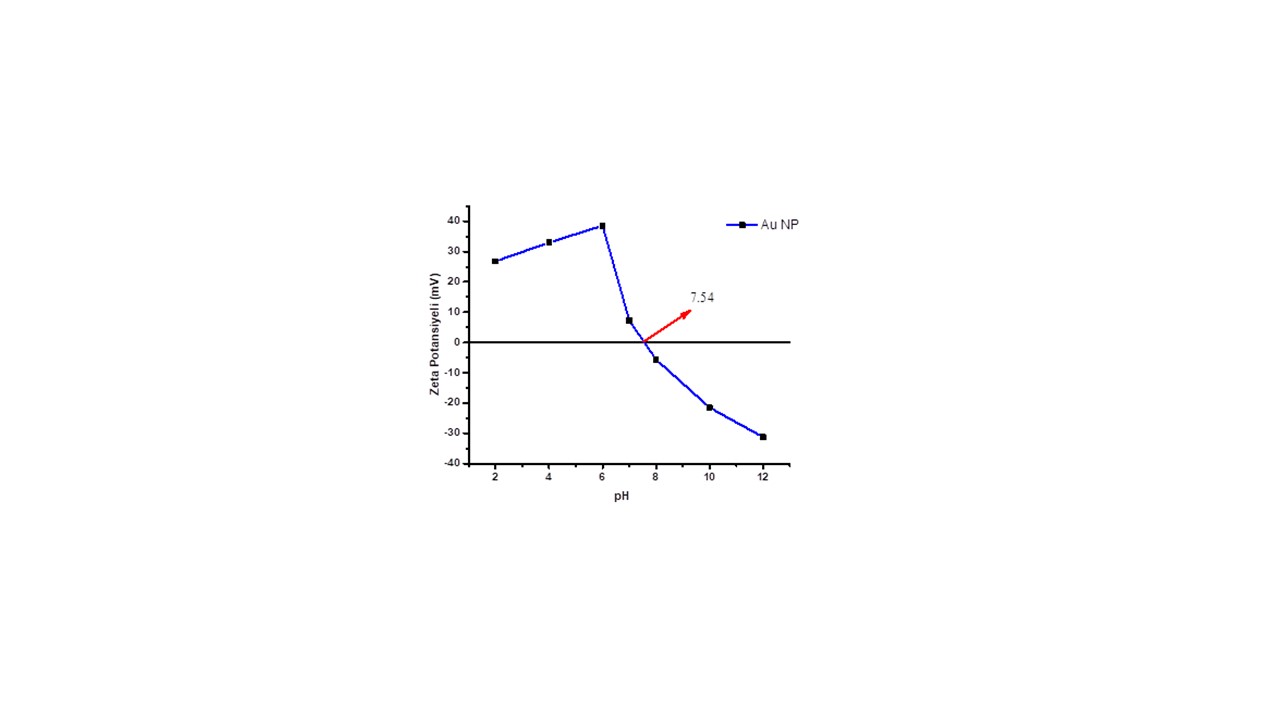


**Figure S3.** Zeta potential plot of AuNP


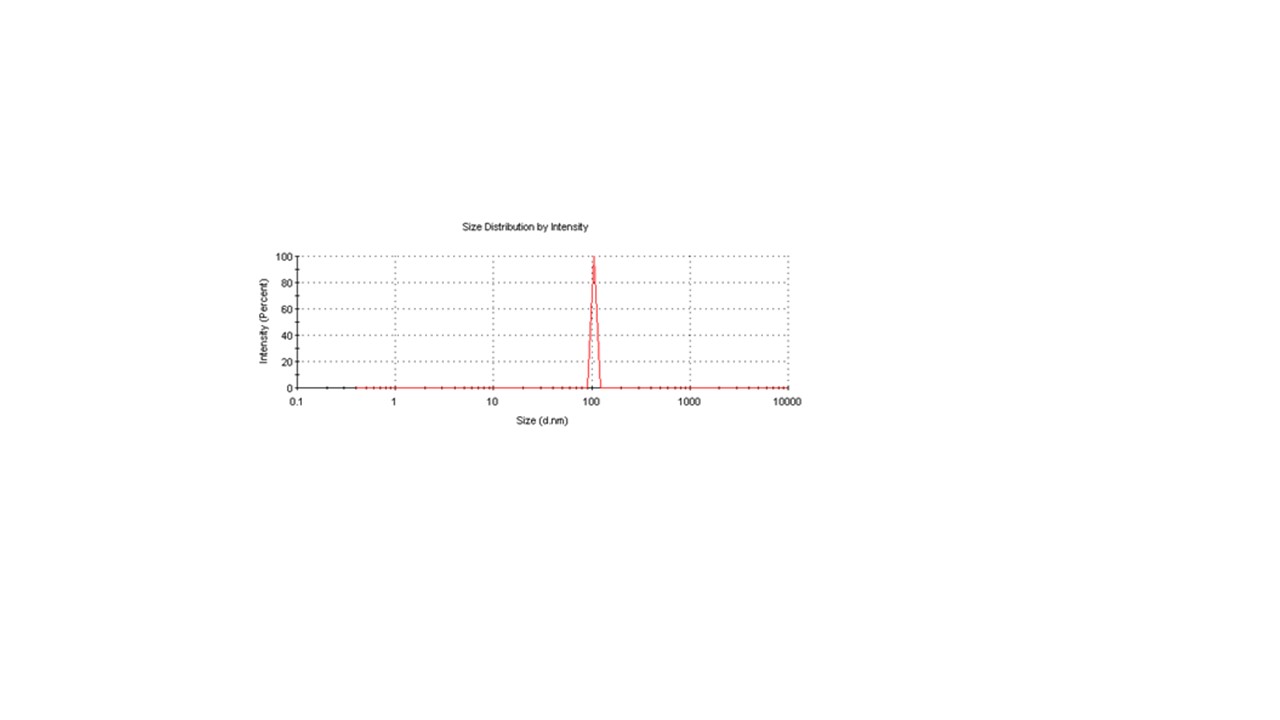


**Figure S4.** Particle size distribution graph of AuNP


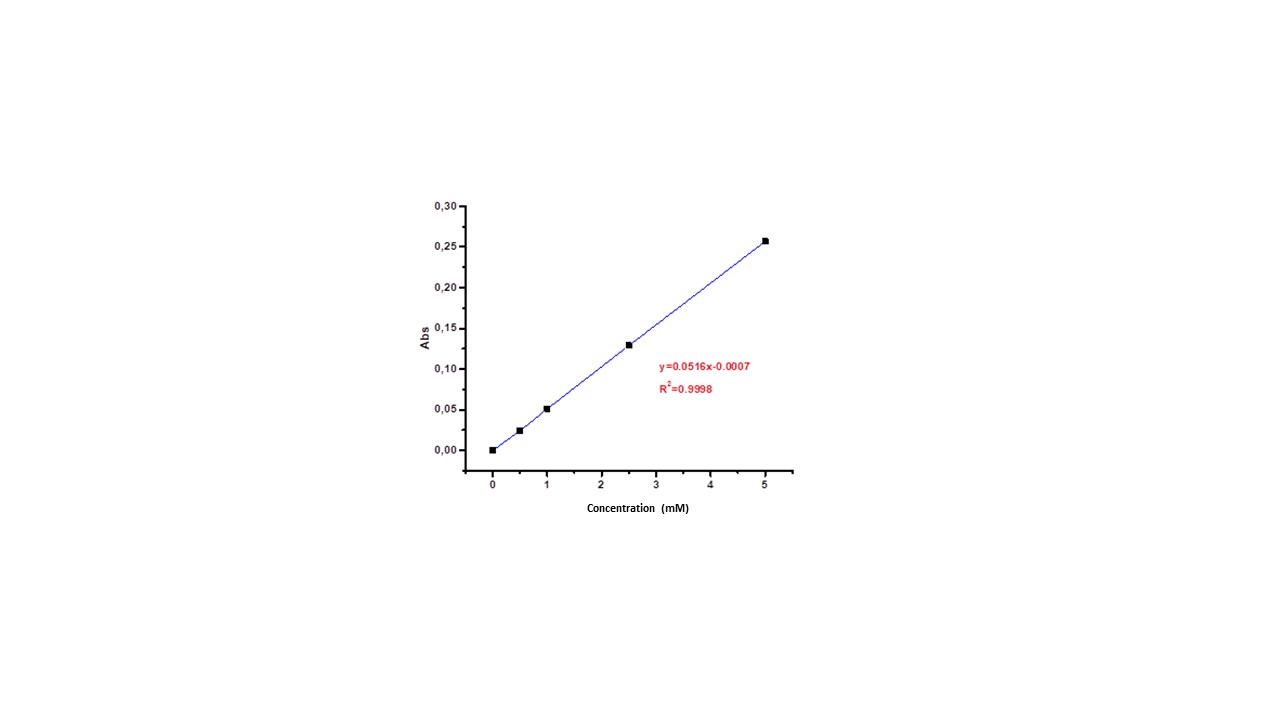


**Figure S5.** Calibration graph of PEITC
